# Supplementary material
Source: PubMed Central journal article supplement (PMC10520579)
Supplement: S0033291722003579sup001.pdf [file S0033291722003579sup001.pdf]

**SUPPLEMENTAL MATERIALS:**

**Influences of Intrinsic Patterns of Functional Brain Connectivity on the Antidepressant Treatment Response in Late-Life Depression**

**Supplemental Table 1 – Cortical Regions of Interest (ROIs) and Composite Seeds Chosen for Functional Connectivity Analysis**

| <i>ROI</i>                                               | <i>Network</i>        | <i>Area (Schaefer)*</i> | <i>Parcel (Schaefer)<sup>†</sup></i>                |
|----------------------------------------------------------|-----------------------|-------------------------|-----------------------------------------------------|
| Posterior Cingulate Cortex (PCC)/ Precuneus              | DMN                   | LH/pCunPCC_3            | 192                                                 |
|                                                          | DMN                   | RH/pCunPCC_4            | 395                                                 |
| <b>Consolidated Bilateral PCC</b>                        | <b>DMN</b>            |                         | <b>Combined 192 and 395</b>                         |
| <b>Rostral/Pregenua Anterior Cingulate Cortex (rACC)</b> | <b>DMN</b>            | <b>LH/PFC_9</b>         | <b>174</b>                                          |
|                                                          | <b>DMN</b>            | <b>RH/PFCdPFCm_3</b>    | <b>381</b>                                          |
| Medial Prefrontal Cortex (mPFC)                          | DMN                   | LH/PFC_3                | 168                                                 |
|                                                          | DMN                   | LH/PFC_8                | 173                                                 |
| <b>Consolidated Left mPFC</b>                            | <b>DMN</b>            |                         | <b>Combined 168 and 173</b>                         |
|                                                          | DMN                   | RH/PFCdPFCm_1           | 379                                                 |
|                                                          | DMN                   | RH/PFCdPFCm_2           | 380                                                 |
|                                                          | DMN                   | RH/PFCdPFCm_4           | 382                                                 |
| <b>Consolidated Right mPFC</b>                           | <b>DMN</b>            |                         | <b>Combined 379, 380, and 382</b>                   |
| Subgenual Anterior Cingulate Cortex (sgACC) <sup>‡</sup> | Limbic Network        | LH/OFC_7                | 177 <sup>‡</sup>                                    |
|                                                          | DMN                   | RH/PFCdPFCm_1           | 568 <sup>‡</sup>                                    |
| <b>Consolidated Bilateral sgACC</b>                      | <b>DMN</b>            |                         | <b>Combined 177<sup>‡</sup> and 568<sup>‡</sup></b> |
| Orbitofrontal Cortex (OFC)                               | Limbic Network        | LH/OFC_1                | 114                                                 |
|                                                          | Limbic Network        | LH/OFC_3                | 116                                                 |
|                                                          | Limbic Network        | LH/OFC_4                | 117                                                 |
| <b>Consolidated Left OFC</b>                             | <b>Limbic Network</b> |                         | <b>Combined 114, 116, and 117</b>                   |
|                                                          | Limbic Network        | RH/OFC_1                | 319                                                 |
|                                                          | Limbic Network        | RH/OFC_3                | 321                                                 |
|                                                          | Limbic Network        | RH/OFC_5                | 323                                                 |

|                                         |                       |            |                                   |
|-----------------------------------------|-----------------------|------------|-----------------------------------|
| <b>Consolidated Right OFC</b>           | <b>Limbic Network</b> |            | <b>Combined 319, 321, 323</b>     |
| Dorsolateral Prefrontal Cortex (DLPFC)  | CCN                   | LH/PFCI_5  | 139                               |
|                                         | CCN                   | LH/PFCI_6  | 140                               |
|                                         | CCN                   | LH/PFCI_8  | 142                               |
| <b>Combined Left DLPFC</b>              | <b>CCN</b>            |            | <b>Combined 139, 140, and 142</b> |
|                                         | CCN                   | RH/PFCI_9  | 349                               |
|                                         | CCN                   | RH/PFCI_11 | 351                               |
| <b>Combined Right DLPFC</b>             | <b>CCN</b>            |            | <b>Combined 349 and 351</b>       |
| Dorsal Anterior Cingulate Cortex (dACC) | CCN                   | LH/Cing_1  | 146                               |
|                                         | CCN                   | RH/Cing_2  | 359                               |

Regions of interest were chosen based on current fMRI literature in late-life depression (LLD). Using the functional connectivity based Schaefer parcellation of the Yeo atlas, specific parcels were chosen to represent ROIs. Final analytic seeds used for functional connectivity analysis are bolded. \* = Area is described using the notation directly from the Schaefer parcellation. † = parcel number is derived from the 400-parcel, 7-network Schaefer atlas unless otherwise noted. ‡ = for the sgACC, parcels were chosen from the 600-parcel, 7-network Schaefer atlas. ROI = region of interest; DMN = default mode network; LH = left hemisphere; RH = right hemisphere; CCN = cognitive control network.

Supplemental Table 2 – Seed-to-Seed Pair Results for Secondary Analyses

| <b>Three-Way Interaction</b>                      |               |                 |             |                |                |
|---------------------------------------------------|---------------|-----------------|-------------|----------------|----------------|
| <b>Treatment * Time * Functional Connectivity</b> |               |                 |             |                |                |
| <b>DMN Primary Seeds</b>                          |               |                 |             |                |                |
| <i>Seed 1</i>                                     | <i>Seed 2</i> | <i>Estimate</i> | <i>SE</i>   | <i>T-value</i> | <i>P-value</i> |
| PCC                                               | mPFC_L        | 1.79            | 1.49        | 1.20           | 0.2306         |
|                                                   | mPFC_R        | 0.30            | 1.71        | 0.17           | 0.8633         |
|                                                   | rACC_L        | 0.24            | 1.63        | 0.15           | 0.882          |
|                                                   | rACC_R        | -1.69           | 1.58        | -1.07          | 0.285          |
|                                                   | sgACC         | 0.06            | 0.92        | 0.07           | 0.9449         |
|                                                   | hpc_L         | -0.08           | 1.04        | -0.08          | 0.9356         |
|                                                   | hpc_R         | -1.15           | 1.28        | -0.90          | 0.3671         |
| mPFC_L                                            | rACC_L        | -0.05           | 1.60        | -0.03          | 0.9738         |
|                                                   | rACC_R        | 1.03            | 1.42        | 0.73           | 0.467          |
|                                                   | sgACC_B       | -2.60           | 1.54        | -1.68          | 0.0932         |
| <b>mPFC_R</b>                                     | <b>rACC_L</b> | <b>-3.35</b>    | <b>1.41</b> | <b>-2.38</b>   | <b>0.0179</b>  |
|                                                   | rACC_R        | -2.04           | 1.59        | -1.28          | 0.2006         |
|                                                   | sgACC         | -1.09           | 1.38        | -0.79          | 0.4291         |
| <b>Limbic Network Primary Seeds</b>               |               |                 |             |                |                |
| <i>Seed 1</i>                                     | <i>Seed 2</i> | <i>Estimate</i> | <i>SE</i>   | <i>T-value</i> | <i>P-value</i> |
| OFC_L                                             | hpc_L         | -1.27           | 1.40        | -0.91          | 0.3629         |
|                                                   | hpc_R         | -0.65           | 1.58        | -0.41          | 0.682          |
|                                                   | amyg_L        | 0.83            | 1.58        | 0.53           | 0.5988         |
|                                                   | amyg_R        | -0.09           | 1.46        | -0.06          | 0.9515         |
| OFC_R                                             | hpc_L         | -1.95           | 1.33        | -1.47          | 0.1433         |
|                                                   | hpc_R         | -0.18           | 1.56        | -0.11          | 0.9088         |
|                                                   | amyg_L        | -0.61           | 1.82        | -0.34          | 0.737          |
|                                                   | amyg_R        | -0.18           | 1.02        | -0.17          | 0.8613         |
| sgACC_B                                           | hpc_L         | 0.77            | 0.98        | 0.78           | 0.4341         |
|                                                   | hpc_R         | 1.32            | 1.18        | 1.12           | 0.265          |
|                                                   | amyg_L        | 0.66            | 1.22        | 0.54           | 0.5862         |
|                                                   | amyg_R        | -0.59           | 1.26        | -0.47          | 0.6372         |
| <b>CCN Primary Seeds</b>                          |               |                 |             |                |                |
| <i>Seed 1</i>                                     | <i>Seed 2</i> | <i>Estimate</i> | <i>SE</i>   | <i>T-value</i> | <i>P-value</i> |
| DLPFC_L                                           | dACC_L        | 0.19            | 1.09        | 0.18           | 0.8583         |
|                                                   | dACC_R        | -0.49           | 1.08        | -0.45          | 0.6544         |
| DLPFC_R                                           | dACC_L        | -1.40           | 1.28        | -1.09          | 0.2771         |
|                                                   | dACC_R        | 0.44            | 1.42        | 0.31           | 0.757          |
| <b>Two-Way Interaction</b>                        |               |                 |             |                |                |
| <b>Time * Functional Connectivity</b>             |               |                 |             |                |                |
| <b>DMN Primary Seeds</b>                          |               |                 |             |                |                |
| <i>Seed 1</i>                                     | <i>Seed 2</i> | <i>Estimate</i> | <i>SE</i>   | <i>T-value</i> | <i>P-value</i> |
| <b>PCC</b>                                        | mPFC_L        | -0.17           | 0.71        | -0.24          | 0.8085         |
|                                                   | mPFC_R        | 0.25            | 0.80        | 0.32           | 0.7507         |

|                                     |               |                 |             |                |                |
|-------------------------------------|---------------|-----------------|-------------|----------------|----------------|
|                                     | rACC_L        | 0.72            | 0.81        | 0.89           | 0.3741         |
|                                     | rACC_R        | 0.70            | 0.79        | 0.89           | 0.3736         |
|                                     | sgACC         | -0.76           | 0.44        | -1.73          | 0.0852         |
|                                     | <b>hpc_L</b>  | <b>-0.98</b>    | <b>0.47</b> | <b>-2.09</b>   | <b>0.0372</b>  |
|                                     | hpc_R         | -0.47           | 0.60        | -0.79          | 0.4325         |
| mPFC_L                              | rACC_L        | 0.01            | 0.73        | 0.02           | 0.9857         |
|                                     | rACC_R        | 0.32            | 0.69        | 0.46           | 0.6470         |
|                                     | sgACC         | -0.47           | 0.73        | -0.64          | 0.5201         |
| mPFC_R                              | rACC_L        | -1.14           | 0.66        | -1.72          | 0.0868         |
|                                     | rACC_R        | -0.39           | 0.71        | -0.55          | 0.5810         |
|                                     | sgACC         | 0.03            | 0.65        | 0.05           | 0.9589         |
| <b>Limbic Network Primary Seeds</b> |               |                 |             |                |                |
| <i>Seed 1</i>                       | <i>Seed 2</i> | <i>Estimate</i> | <i>SE</i>   | <i>T-value</i> | <i>P-value</i> |
| OFC_L                               | hpc_L         | -0.29           | 0.65        | -0.44          | 0.6567         |
|                                     | hpc_R         | 0.60            | 0.78        | 0.76           | 0.4473         |
|                                     | amyg_L        | 1.08            | 0.75        | 1.44           | 0.1509         |
|                                     | amyg_R        | 0.06            | 0.72        | 0.09           | 0.9318         |
| OFC_R                               | hpc_L         | -1.09           | 0.66        | -1.65          | 0.0992         |
|                                     | hpc_R         | 0.32            | 0.76        | 0.42           | 0.6718         |
|                                     | amyg_L        | 1.54            | 0.82        | 1.89           | 0.0603         |
|                                     | amyg_R        | -0.06           | 0.48        | -0.13          | 0.8968         |
| sgACC                               | hpc_L         | -0.13           | 0.47        | -0.27          | 0.7866         |
|                                     | hpc_R         | -0.61           | 0.56        | -1.09          | 0.2767         |
|                                     | amyg_L        | -0.89           | 0.52        | -1.72          | 0.0857         |
|                                     | amyg_R        | -0.45           | 0.62        | -0.73          | 0.4641         |
| <b>CCN Primary Seeds</b>            |               |                 |             |                |                |
| <i>Seed 1</i>                       | <i>Seed 2</i> | <i>Estimate</i> | <i>SE</i>   | <i>T-value</i> | <i>P-value</i> |
| DLPFC_L                             | dACC_L        | -0.24           | 0.53        | -0.46          | 0.6474         |
|                                     | dACC_R        | -0.79           | 0.50        | -1.57          | 0.1178         |
| DLPFC_R                             | dACC_L        | -0.41           | 0.62        | -0.67          | 0.5054         |
|                                     | dACC_R        | -0.04           | 0.68        | -0.07          | 0.9477         |

Initial models examined FC for each seed pair in 3-way interactions (treatment assignment by time by functional connectivity), including covariates of age and sex. When those were not statistically significant, the 3-way interaction term was removed and the remaining two-way interactions were examined (treatment assignment by functional connectivity; time by functional connectivity). The table above shows statistical analyses of each seed-to-seed pair, arranged by the network represented by seed 1 in the pair. Statistically significant interactions between pairs ( $p < 0.05$ ) are denoted with bolding and an asterisk.

Note that for significant statistical interactions, as a final step gray matter volumes of the seed regions were added to the final model. This statistical approach and final statistical result data are included in the main manuscript.

Tx = treatment assignment; Ti = time; FC = functional connectivity; DMN = default mode network; \_L = left hemispheric seed; \_R = right hemispheric seed; PCC = posterior cingulate cortex; mPFC = medial prefrontal cortex; rACC = rostral anterior cingulate cortex; sgACC =

subgenual anterior cingulate cortex; hpc = hippocampus; OFC = orbitofrontal cortex; amygdala = amygdala; CCN = cognitive control network; DLPFC = dorsolateral prefrontal cortex; dACC = dorsal anterior cingulate cortex.
